# Supplementary material
Source: publisher figshare collection journal article supplement (https://acs.figshare.com/ndownloader/files/4049161)
Supplement: Supplementary file 1 [file 4049161]

 
data_salpb241
 
_audit_creation_method            SHELXL-97
_chemical_name_systematic
;
 ?
;
_chemical_name_common             ?
_chemical_melting_point           ?
_chemical_formula_moiety          ?
_chemical_formula_sum
 'C16 H12 N2 O5 Pb'
_chemical_formula_weight          519.47
 
loop_
 _atom_type_symbol
 _atom_type_description
 _atom_type_scat_dispersion_real
 _atom_type_scat_dispersion_imag
 _atom_type_scat_source
 'C'  'C'   0.0033   0.0016
 'International Tables Vol C Tables 4.2.6.8 and 6.1.1.4'
 'H'  'H'   0.0000   0.0000
 'International Tables Vol C Tables 4.2.6.8 and 6.1.1.4'
 'N'  'N'   0.0061   0.0033
 'International Tables Vol C Tables 4.2.6.8 and 6.1.1.4'
 'O'  'O'   0.0106   0.0060
 'International Tables Vol C Tables 4.2.6.8 and 6.1.1.4'
 'Pb'  'Pb'  -3.3944  10.1111
 'International Tables Vol C Tables 4.2.6.8 and 6.1.1.4'
 
_symmetry_cell_setting            'monoclinic'
_symmetry_space_group_name_H-M    C2/c
 
loop_
 _symmetry_equiv_pos_as_xyz
 'x, y, z'
 '-x, y, -z+1/2'
 'x+1/2, y+1/2, z'
 '-x+1/2, y+1/2, -z+1/2'
 '-x, -y, -z'
 'x, -y, z-1/2'
 '-x+1/2, -y+1/2, -z'
 'x+1/2, -y+1/2, z-1/2'
 
_cell_length_a                    10.253(2)
_cell_length_b                    20.192(4)
_cell_length_c                    8.337(2)
_cell_angle_alpha                 90.00
_cell_angle_beta                  117.410(10)
_cell_angle_gamma                 90.00
_cell_volume                      1532.2(6)
_cell_formula_units_Z             4
_cell_measurement_temperature     180(2)
_cell_measurement_reflns_used     ?
_cell_measurement_theta_min       ?
_cell_measurement_theta_max       ?
 
_exptl_crystal_description        'parallelepiped'
_exptl_crystal_colour             'colorless'
_exptl_crystal_size_max           0.45
_exptl_crystal_size_mid           0.22
_exptl_crystal_size_min           0.17
_exptl_crystal_density_meas       ?
_exptl_crystal_density_diffrn     2.252
_exptl_crystal_density_method     'not measured'
_exptl_crystal_F_000              976
_exptl_absorpt_coefficient_mu     11.041
_exptl_absorpt_correction_type    'empirical'
_exptl_absorpt_correction_T_min   0.280
_exptl_absorpt_correction_T_max   1.000
_exptl_absorpt_process_details    'CrystalClear, Rigaku MSC, 2005'
 
_exptl_special_details
;
 ?
;
 
_diffrn_ambient_temperature       180(2)
_diffrn_radiation_wavelength      0.71073
_diffrn_radiation_type            MoK\a
_diffrn_radiation_source          'fine-focus sealed tube'
_diffrn_radiation_monochromator   graphite
_diffrn_measurement_device_type   'Rigaku R-AXIS SPIDER IPDS'
_diffrn_measurement_method        '\q scans'
_diffrn_detector_area_resol_mean  ?
_diffrn_standards_number          ?
_diffrn_standards_interval_count  ?
_diffrn_standards_interval_time   ?
_diffrn_standards_decay_%         ?
_diffrn_reflns_number             8555
_diffrn_reflns_av_R_equivalents   0.0523
_diffrn_reflns_av_sigmaI/netI     0.0375
_diffrn_reflns_limit_h_min        -12
_diffrn_reflns_limit_h_max        12
_diffrn_reflns_limit_k_min        -24
_diffrn_reflns_limit_k_max        24
_diffrn_reflns_limit_l_min        -10
_diffrn_reflns_limit_l_max        10
_diffrn_reflns_theta_min          2.82
_diffrn_reflns_theta_max          26.00
_reflns_number_total              1498
_reflns_number_gt                 1494
_reflns_threshold_expression      >2sigma(I)
 
_computing_data_collection        'CrystalClear, Rigaku MSC, 2005'
_computing_cell_refinement        'CrystalClear, Rigaku MSC, 2005'
_computing_data_reduction         'CrystalClear, Rigaku MSC, 2005'
_computing_structure_solution     'SHELXS-97 (Sheldrick, 1997)'
_computing_structure_refinement   'SHELXL-97 (Sheldrick, 1997)'
_computing_molecular_graphics     ?
_computing_publication_material   ?
 
_refine_special_details
;
 Refinement of F^2^ against ALL reflections.  The weighted R-factor wR and
 goodness of fit S are based on F^2^, conventional R-factors R are based
 on F, with F set to zero for negative F^2^. The threshold expression of
 F^2^ > 2sigma(F^2^) is used only for calculating R-factors(gt) etc. and is
 not relevant to the choice of reflections for refinement.  R-factors based
 on F^2^ are statistically about twice as large as those based on F, and R-
 factors based on ALL data will be even larger.
;
 
_refine_ls_structure_factor_coef  Fsqd
_refine_ls_matrix_type            full
_refine_ls_weighting_scheme       calc
_refine_ls_weighting_details
 'calc w=1/[\s^2^(Fo^2^)+(0.0279P)^2^+8.6841P] where P=(Fo^2^+2Fc^2^)/3'
_atom_sites_solution_primary      direct
_atom_sites_solution_secondary    difmap
_atom_sites_solution_hydrogens    geom
_refine_ls_hydrogen_treatment     refall
_refine_ls_extinction_method      SHELXL
_refine_ls_extinction_coef        0.0036(3)
_refine_ls_extinction_expression
 'Fc^*^=kFc[1+0.001xFc^2^\l^3^/sin(2\q)]^-1/4^'
_refine_ls_number_reflns          1498
_refine_ls_number_parameters      134
_refine_ls_number_restraints      0
_refine_ls_R_factor_all           0.0286
_refine_ls_R_factor_gt            0.0285
_refine_ls_wR_factor_ref          0.0723
_refine_ls_wR_factor_gt           0.0722
_refine_ls_goodness_of_fit_ref    1.160
_refine_ls_restrained_S_all       1.160
_refine_ls_shift/su_max           0.003
_refine_ls_shift/su_mean          0.000
 
loop_
 _atom_site_label
 _atom_site_type_symbol
 _atom_site_fract_x
 _atom_site_fract_y
 _atom_site_fract_z
 _atom_site_U_iso_or_equiv
 _atom_site_adp_type
 _atom_site_occupancy
 _atom_site_symmetry_multiplicity
 _atom_site_calc_flag
 _atom_site_refinement_flags
 _atom_site_disorder_assembly
 _atom_site_disorder_group
Pb Pb 0.0000 0.041029(13) 0.7500 0.02834(18) Uani 1 2 d S . .
N1 N -0.0576(5) 0.1475(2) 0.5666(6) 0.0292(10) Uani 1 1 d . . .
C1 C -0.1189(7) 0.1473(3) 0.3853(8) 0.0382(14) Uani 1 1 d . . .
C2 C -0.1528(7) 0.2061(4) 0.2833(9) 0.0421(15) Uani 1 1 d . . .
C3 C -0.1246(7) 0.2656(3) 0.3689(9) 0.0405(15) Uani 1 1 d . . .
C4 C -0.0625(6) 0.2676(3) 0.5600(9) 0.0345(13) Uani 1 1 d . . .
C5 C -0.0303(6) 0.2065(3) 0.6553(8) 0.0304(12) Uani 1 1 d . . .
C6 C -0.0304(7) 0.3285(3) 0.6601(10) 0.0401(14) Uani 1 1 d . . .
O11 O 0.2656(5) 0.0748(3) 0.8048(6) 0.0482(12) Uani 1 1 d . . .
O12 O 0.1597(7) 0.0138(3) 0.5686(9) 0.0732(15) Uani 1 1 d . . .
C11 C 0.2616(7) 0.0505(3) 0.6692(9) 0.0372(14) Uani 1 1 d . . .
C12 C 0.3851(8) 0.0637(5) 0.6214(10) 0.0485(17) Uani 1 1 d . . .
O13 O 0.5000 0.1005(3) 0.7500 0.0506(18) Uani 1 2 d S . .
H1 H -0.133(7) 0.101(4) 0.329(9) 0.039(17) Uiso 1 1 d . . .
H2 H -0.198(8) 0.205(4) 0.161(10) 0.05(2) Uiso 1 1 d . . .
H3 H -0.140(7) 0.302(3) 0.306(9) 0.036(18) Uiso 1 1 d . . .
H6 H -0.057(7) 0.362(4) 0.606(9) 0.032(18) Uiso 1 1 d . . .
H12A H 0.353(13) 0.087(6) 0.515(16) 0.11(4) Uiso 1 1 d . . .
H12B H 0.422(8) 0.022(4) 0.619(9) 0.037(19) Uiso 1 1 d . . .
 
loop_
 _atom_site_aniso_label
 _atom_site_aniso_U_11
 _atom_site_aniso_U_22
 _atom_site_aniso_U_33
 _atom_site_aniso_U_23
 _atom_site_aniso_U_13
 _atom_site_aniso_U_12
Pb 0.0241(2) 0.0272(2) 0.0346(2) 0.000 0.01432(15) 0.000
N1 0.023(2) 0.029(2) 0.033(2) 0.0006(19) 0.0107(19) -0.0022(19)
C1 0.034(3) 0.042(4) 0.035(3) 0.005(3) 0.014(3) -0.002(3)
C2 0.035(3) 0.054(4) 0.036(3) 0.011(3) 0.015(3) 0.000(3)
C3 0.033(3) 0.038(3) 0.051(4) 0.014(3) 0.019(3) 0.001(3)
C4 0.023(3) 0.033(3) 0.049(3) 0.008(3) 0.019(3) 0.000(2)
C5 0.017(2) 0.026(3) 0.048(3) 0.001(2) 0.016(2) 0.001(2)
C6 0.027(3) 0.030(3) 0.064(4) 0.007(3) 0.022(3) 0.002(3)
O11 0.041(2) 0.057(3) 0.056(3) -0.024(2) 0.030(2) -0.019(2)
O12 0.059(3) 0.075 0.088(4) -0.042(3) 0.036(3) -0.028(3)
C11 0.026(3) 0.043(4) 0.040(3) -0.007(3) 0.014(3) -0.005(3)
C12 0.032(3) 0.071(6) 0.045(4) 0.003(4) 0.020(3) 0.006(4)
O13 0.028(3) 0.037(4) 0.091(5) 0.000 0.031(4) 0.000
 
_geom_special_details
;
 All esds (except the esd in the dihedral angle between two l.s. planes)
 are estimated using the full covariance matrix.  The cell esds are taken
 into account individually in the estimation of esds in distances, angles
 and torsion angles; correlations between esds in cell parameters are only
 used when they are defined by crystal symmetry.  An approximate (isotropic)
 treatment of cell esds is used for estimating esds involving l.s. planes.
;
 
loop_
 _geom_bond_atom_site_label_1
 _geom_bond_atom_site_label_2
 _geom_bond_distance
 _geom_bond_site_symmetry_2
 _geom_bond_publ_flag
Pb N1 2.544(5) 2_556 ?
Pb N1 2.544(5) . ?
Pb O11 2.635(4) 2_556 ?
Pb O11 2.635(4) . ?
Pb O12 2.638(6) 5_556 ?
Pb O12 2.638(6) 6_556 ?
Pb O12 2.747(6) 2_556 ?
Pb O12 2.747(6) . ?
N1 C1 1.343(8) . ?
N1 C5 1.362(7) . ?
C1 C2 1.408(9) . ?
C1 H1 1.02(7) . ?
C2 C3 1.358(10) . ?
C2 H2 0.91(8) . ?
C3 C4 1.418(9) . ?
C3 H3 0.87(7) . ?
C4 C5 1.422(8) . ?
C4 C6 1.437(9) . ?
C5 C5 1.406(12) 2_556 ?
C6 C6 1.333(15) 2_556 ?
C6 H6 0.80(7) . ?
O11 C11 1.215(8) . ?
O12 C11 1.239(8) . ?
O12 Pb 2.638(6) 5_556 ?
C11 C12 1.516(10) . ?
C12 O13 1.387(9) . ?
C12 H12A 0.92(12) . ?
C12 H12B 0.94(7) . ?
O13 C12 1.387(9) 2_656 ?
 
loop_
 _geom_angle_atom_site_label_1
 _geom_angle_atom_site_label_2
 _geom_angle_atom_site_label_3
 _geom_angle
 _geom_angle_site_symmetry_1
 _geom_angle_site_symmetry_3
 _geom_angle_publ_flag
N1 Pb N1 64.7(2) 2_556 . ?
N1 Pb O11 79.72(16) 2_556 2_556 ?
N1 Pb O11 75.04(14) . 2_556 ?
N1 Pb O11 75.04(14) 2_556 . ?
N1 Pb O11 79.72(16) . . ?
O11 Pb O11 150.0(2) 2_556 . ?
N1 Pb O12 145.54(19) 2_556 5_556 ?
N1 Pb O12 83.4(2) . 5_556 ?
O11 Pb O12 79.69(18) 2_556 5_556 ?
O11 Pb O12 113.33(16) . 5_556 ?
N1 Pb O12 83.4(2) 2_556 6_556 ?
N1 Pb O12 145.54(19) . 6_556 ?
O11 Pb O12 113.33(16) 2_556 6_556 ?
O11 Pb O12 79.69(18) . 6_556 ?
O12 Pb O12 130.3(3) 5_556 6_556 ?
N1 Pb O12 82.56(19) 2_556 2_556 ?
N1 Pb O12 117.84(16) . 2_556 ?
O11 Pb O12 46.91(15) 2_556 2_556 ?
O11 Pb O12 141.86(18) . 2_556 ?
O12 Pb O12 102.67(18) 5_556 2_556 ?
O12 Pb O12 67.2(2) 6_556 2_556 ?
N1 Pb O12 117.84(16) 2_556 . ?
N1 Pb O12 82.56(19) . . ?
O11 Pb O12 141.86(17) 2_556 . ?
O11 Pb O12 46.91(15) . . ?
O12 Pb O12 67.2(2) 5_556 . ?
O12 Pb O12 102.67(18) 6_556 . ?
O12 Pb O12 157.0(3) 2_556 . ?
C1 N1 C5 119.0(5) . . ?
C1 N1 Pb 122.2(4) . . ?
C5 N1 Pb 118.7(4) . . ?
N1 C1 C2 122.3(6) . . ?
N1 C1 H1 115(4) . . ?
C2 C1 H1 123(4) . . ?
C3 C2 C1 119.6(6) . . ?
C3 C2 H2 120(5) . . ?
C1 C2 H2 121(5) . . ?
C2 C3 C4 119.5(6) . . ?
C2 C3 H3 119(4) . . ?
C4 C3 H3 121(4) . . ?
C3 C4 C5 118.1(6) . . ?
C3 C4 C6 122.8(6) . . ?
C5 C4 C6 119.1(6) . . ?
N1 C5 C5 118.9(3) . 2_556 ?
N1 C5 C4 121.3(5) . . ?
C5 C5 C4 119.8(4) 2_556 . ?
C6 C6 C4 121.1(4) 2_556 . ?
C6 C6 H6 120(5) 2_556 . ?
C4 C6 H6 119(5) . . ?
C11 O11 Pb 98.3(4) . . ?
C11 O12 Pb 150.6(6) . 5_556 ?
C11 O12 Pb 92.2(4) . . ?
Pb O12 Pb 112.8(2) 5_556 . ?
O11 C11 O12 121.8(7) . . ?
O11 C11 C12 119.9(6) . . ?
O12 C11 C12 118.3(7) . . ?
O13 C12 C11 113.9(6) . . ?
O13 C12 H12A 105(8) . . ?
C11 C12 H12A 112(7) . . ?
O13 C12 H12B 107(4) . . ?
C11 C12 H12B 104(5) . . ?
H12A C12 H12B 115(8) . . ?
C12 O13 C12 115.4(9) . 2_656 ?
 
_diffrn_measured_fraction_theta_max    0.995
_diffrn_reflns_theta_full              26.00
_diffrn_measured_fraction_theta_full   0.995
_refine_diff_density_max    1.742
_refine_diff_density_min   -1.166
_refine_diff_density_rms    0.145
